# Supplementary material
Source: MDPI journal article supplement (https://www.mdpi.com/2306-5338/4/3/40)
Supplement: s1 [file s1]

## Water Balance Analysis over the Niger Inland Delta-Mali: Spatio-Temporal Dynamics of the Flooded Area and Water Losses

**Table S1.** Data availability and periods of records for the main climatic variables and evaporation at Mopti synoptic station (longitude =  $-4.1$ , latitude =  $14.52$ , Elevation =  $272$  m).

| Data                                | Units              | Periods of Records | Time scale     |
|-------------------------------------|--------------------|--------------------|----------------|
| Air Temperature minimum & maximum   | $^{\circ}\text{C}$ | 1980–2010          | daily observed |
| Mopti pan evaporation               | mm                 | 1970–2009          | monthly        |
| Relative humidity minimum & maximum | %                  | 1980–2010          | daily observed |
| Wind speed                          | m/s                | 1980 - 2010        | daily observed |

**Table S2.** Inputs data of all potential ET methods used in this study.

| ET Methods                                        | Data Requirements                                                                                                                                                                                                                                | Variables Description                                                                                                                                                                                                                                                                                                                                                                                                                                                                                                                                               |
|---------------------------------------------------|--------------------------------------------------------------------------------------------------------------------------------------------------------------------------------------------------------------------------------------------------|---------------------------------------------------------------------------------------------------------------------------------------------------------------------------------------------------------------------------------------------------------------------------------------------------------------------------------------------------------------------------------------------------------------------------------------------------------------------------------------------------------------------------------------------------------------------|
| <b>Hargreaves method (HARG)</b>                   | $T_a$ and $R_s$ (mean daily air temperature and solar radiation respectively)                                                                                                                                                                    | Air temperature measured at height of $1.2$ m above the ground, ( $^{\circ}\text{C}$ ); Solar radiation estimated for clear sky (no clouds) condition as the total incoming short-wave radiation.                                                                                                                                                                                                                                                                                                                                                                   |
| <b>Hamon method (HAM)</b>                         | $T_a$ and DL (mean daily air temperature and day length)                                                                                                                                                                                         | Day length the maximum possible daylight hours for a given day calculated from the sunset hour angle.                                                                                                                                                                                                                                                                                                                                                                                                                                                               |
| <b>Oudin method (OUD)</b>                         | $T_a$ , $R_e$ , $\lambda$ , and $\rho$ (mean daily air temperature, extraterrestrial radiation, latent heat flux and density of water)                                                                                                           | The extraterrestrial radiation, $R_e$ , is expressed in equivalent evaporation units for a given latitude and day; The latent heat is the energy used for phase change from liquid to vapor during the ET process; The water density is at $20$ $^{\circ}\text{C}$ .                                                                                                                                                                                                                                                                                                |
| <b>Modified Turc method (TUR)</b>                 | $T_{\max}$ and $S_t$ (daily maximum air temperature, solar radiation)                                                                                                                                                                            | $S_t$ is the total incoming short-wave Radiation                                                                                                                                                                                                                                                                                                                                                                                                                                                                                                                    |
| <b>Penman-Monteith combination equation (PMO)</b> | $R_n$ , $G$ , $\gamma$ , $\lambda$ , $\Delta$ , $C_p$ , $e_s$ , $e$ (net solar radiation, soil heat flux, psychrometric constant, latent heat flux, slope of vapor pressure, specific heat, saturation vapor pressure and actual vapor pressure) | The net radiation is the difference between incoming and outgoing radiation; Soil heat flux is the sensible heat conducting into or out of the soil; Psychrometric constant is derived from the measured the atmospheric pressure in the area; Slope of vapor pressure is the gradient of the function $de_s/dT_a$ ; $C_p$ is the specific heat of the air at constant pressure; $\theta_s$ & $\theta$ are the maximum and actual partial pressure of water vapor in the air; Surface albedo is the proportion of incident solar radiation reflected by the surface |
| <b>Priestley-Taylor method (PRT)</b>              | $R_n$ , $\gamma$ , $\lambda$ , $\Delta$ and $\alpha_{\text{PRT}}$ (net solar radiation, psychrometric constant, latent heat flux, slope of vapor pressure, and surface albedo)                                                                   |                                                                                                                                                                                                                                                                                                                                                                                                                                                                                                                                                                     |
| <b>Modified Makkink equation (MAK)</b>            | $S_t$ , $\gamma$ , and $\lambda$ (solar radiation, psychrometric constant, and latent heat flux)                                                                                                                                                 |                                                                                                                                                                                                                                                                                                                                                                                                                                                                                                                                                                     |
| <b>Simple Abtew equation (ABT)</b>                | $S_t$ , and $\lambda$ (solar radiation and latent heat flux)                                                                                                                                                                                     |                                                                                                                                                                                                                                                                                                                                                                                                                                                                                                                                                                     |
